# Supplementary material
Source: MDPI journal article supplement (https://www.mdpi.com/1424-8247/16/7/918)
Supplement: s1 [file s1]

## Supplementary Materials

### Indole-acrylonitrile derivatives as potential antitumor and antimicrobial agents – synthesis, *in vitro* and *in silico* studies

Anita Kornicka <sup>1\*</sup>, Karol Gzella <sup>1</sup>, Katarzyna Garbacz <sup>2</sup>, Malgorzata Jarosiewicz <sup>2</sup>, Maria Gdaniec <sup>3</sup>, Joanna Fedorowicz <sup>1</sup>, Łukasz Balewski <sup>1</sup>, Jakub Kokoszka <sup>1</sup>, Anna Ordyszewska <sup>4</sup>

<sup>1</sup> Department of Chemical Technology of Drugs, Faculty of Pharmacy, Medical University of Gdansk, 80-416 Gdansk, Poland

<sup>2</sup> Department of Oral Microbiology, Medical Faculty, Medical University of Gdansk, 80-416 Gdansk, Poland

<sup>3</sup> Faculty of Chemistry, Adam Mickiewicz University, 61-614 Poznań, Poland

<sup>4</sup> Department of Inorganic Chemistry, Faculty of Chemistry and Advanced Materials Centers, Gdańsk University of Technology, Narutowicza 11/12, 80-233 Gdansk, Poland

\*Correspondence: anita.kornicka@gumed.edu.pl.

#### Table of contents:

##### 1. Docking results

**Table S1.** FRED Chemgauss4 scores of the docked ligands **1**, **2a-x**, **3**, **4a-c**, **5a-d**, **6a-b** and **7**. **S2**

**Table S2.** The 2D diagrams of interactions created by compounds **2l** and **5a-d** in the active site of caspase-3 (2xyp) generated by BIOVA Discovery Studio Visualizer and Pose View. **S3**

**Table S3.** The 2D diagrams of interactions created by compounds **2l** and **5a-d** in the active site of caspase-9 (2ar9) generated by BIOVA Discovery Studio Visualizer and Pose View. **S5**

**Table S4.** The 2D diagrams of interactions created by compounds **2l** and **5a-d** in the active site of tubulin (5eyp) generated by BIOVA Discovery Studio Visualizer and Pose View. **S7**

**Table S5.** The 2D diagrams of interactions created by compounds **2x** in the active site of penicillin-binding protein 4 (2ex8) generated by BIOVA Discovery Studio Visualizer and Pose View. **S9**

**Table S6.** The 2D diagrams of interactions created by compounds **2x** in the active site of  $\beta$ -lactamase (1fqg) generated by BIOVA Discovery Studio Visualizer and Pose View. **S9**

##### 2. Calculated ADME/drug-likeness profiles

**Tables S7.** Predicted physicochemical, pharmacokinetic and drug-likeness properties of compounds **2l**, **2x**, **5a-d**. **S10**

**Table S8.** Predicted human intestinal absorption, Caco-2 cell and MDCK cell permeabilities for compounds **2l**, **2x**, **5a-d**. **S11**

**Table S1.** FRED Chemgauss4 scores of the docked ligands **1**, **2a-x**, **3**, **4a-c**, **5a-d**, **6a-b** and **7**.

| Compd                   | FRED Chemgauss4 score |                     |                   |                                           |                              |
|-------------------------|-----------------------|---------------------|-------------------|-------------------------------------------|------------------------------|
|                         | caspase-3<br>(2xyp)   | caspase-9<br>(2ar9) | tubulin<br>(5eyp) | penicillin-binding<br>protein 4<br>(2ex8) | $\beta$ -lactamase<br>(1fqg) |
| <b>1</b>                | -5.23302              | -5.08912            | -8.9825           | -5.27782                                  | -6.51337                     |
| <b>2a</b>               | -5.90363              | -3.884              | -10.8717          | -5.17229                                  | -8.23318                     |
| <b>2b</b>               | -5.08525              | -3.37537            | -11.6776          | -5.77427                                  | -8.2824                      |
| <b>2c</b>               | -5.60849              | -3.65052            | -11.4421          | -5.0086                                   | -8.18364                     |
| <b>2d</b>               | -4.94597              | -3.66019            | -11.2076          | -4.86242                                  | -8.06483                     |
| <b>2e</b>               | -6.27092              | -3.58057            | -10.6082          | -5.30321                                  | -8.12786                     |
| <b>2f</b>               | -5.47292              | -4.32452            | -11.6918          | -4.40842                                  | -7.48552                     |
| <b>2g</b>               | -5.51387              | -3.34911            | -11.1683          | -5.73747                                  | -7.95726                     |
| <b>2h</b>               | -5.67204              | -3.7449             | -11.1333          | -5.90206                                  | -9.63335                     |
| <b>2i</b>               | -5.67204              | -3.7449             | -11.1333          | -5.90206                                  | -9.63335                     |
| <b>2j</b>               | -5.34182              | -3.86886            | -11.1676          | -5.44939                                  | -7.9373                      |
| <b>2k</b>               | -5.11492              | -3.82303            | -10.779           | -5.61474                                  | -8.12498                     |
| <b>2l</b>               | -5.54945              | -3.57143            | -11.4581          | -5.12205                                  | -8.33456                     |
| <b>2m</b>               | -5.85053              | -3.3784             | -10.0974          | -4.70873                                  | -7.88071                     |
| <b>2n</b>               | -4.71896              | -3.80598            | -10.2373          | -4.84896                                  | -7.80353                     |
| <b>2o</b>               | -6.20214              | -3.50577            | -13.2754          | -5.65625                                  | -9.23724                     |
| <b>2p</b>               | -6.61627              | -3.47568            | -12.2016          | -5.56695                                  | -8.22868                     |
| <b>2q</b>               | -5.96685              | -3.61183            | -11.7359          | -5.3542                                   | -9.61483                     |
| <b>2r</b>               | -6.7915               | -4.39583            | -11.7718          | -5.20843                                  | -7.84654                     |
| <b>2s</b>               | -5.65366              | -3.97643            | -11.2263          | -5.48613                                  | -8.53547                     |
| <b>2t</b>               | -5.86027              | -3.8612             | -10.9212          | -5.38187                                  | -8.18399                     |
| <b>2u</b>               | -6.16928              | -4.19446            | -11.1868          | -5.13292                                  | -8.16696                     |
| <b>2v</b>               | -5.27053              | -3.8119             | -11.1987          | -4.94718                                  | -8.15649                     |
| <b>2w</b>               | -6.21192              | -4.00936            | -11.1138          | -4.90712                                  | -8.22966                     |
| <b>2x</b>               | -6.20929              | -6.6242             | -10.2871          | -5.99989                                  | -7.75472                     |
| <b>3</b>                | -6.48325              | -3.37125            | -9.97834          | -4.45381                                  | -8.18494                     |
| <b>4a</b>               | -5.6432               | -4.20064            | -12.4149          | -6.23501                                  | -8.78394                     |
| <b>4b</b>               | -5.85867              | -3.97765            | -11.548           | -6.40248                                  | -8.57117                     |
| <b>4c</b>               | -6.31567              | -4.53341            | -12.3295          | -6.87913                                  | -8.76742                     |
| <b>5a</b>               | -4.98728              | -2.59772            | -12.4227          | -4.76406                                  | -7.88166                     |
| <b>5b</b>               | -4.92247              | -2.4134             | -12.3072          | -4.77243                                  | -7.60658                     |
| <b>5c</b>               | -5.32272              | -2.35997            | -11.5326          | -4.13846                                  | -8.25605                     |
| <b>5d</b>               | -6.09417              | -3.05058            | -13.3035          | -5.41821                                  | -8.54794                     |
| <b>6a</b>               | -5.55541              | -2.59091            | -11.8886          | -4.51006                                  | -8.18193                     |
| <b>6b</b>               | -5.98233              | -3.47475            | -11.6401          | -4.3311                                   | -7.96514                     |
| <b>7</b>                | -4.87739              | -2.1102             | -12.0286          | -4.53795                                  | -7.71406                     |
| <b>original ligand*</b> | -5.14153              | -7.50372            | -17.5854          | -5.65605                                  | -9.54773                     |

\*Phenylmethyl *N*-[(2S)-4-chloro-3-okso-1-phenyl-butan-2-yl]carbamate, D-maleate and colchicine (*N*-[(7S)-1,2,3,10-tetramethoxy-9-oxo-6,7-dihydro-5*H*-benzo[*d*]heptalen-7-yl]-ethanamide) were used as original ligands for 2xyp, 2ar9 and 5eyp, respectively, whereas penicillin G was used as the original ligand for 2ex8 and 1fqg.

**Table S2.** The 2D diagrams of interactions created by compounds **2l** and **5a-d** in the active site of caspase-3 (2xyp) generated by BIOVA Discovery Studio Visualizer and Pose View.

| Compd     | Discovery Studio                                                                                                                                                                                                                       | PoseView                                                |
|-----------|----------------------------------------------------------------------------------------------------------------------------------------------------------------------------------------------------------------------------------------|---------------------------------------------------------|
| <b>2l</b> | <p>Interactions</p> <ul style="list-style-type: none"> <li>Pi-Pi Stacked</li> <li>Pi-Alkyl</li> </ul>                                                                                                                                  |                                                         |
| <b>5a</b> | <p>Interactions</p> <ul style="list-style-type: none"> <li>van der Waals</li> <li>Carbon Hydrogen Bond</li> <li>Pi-Cation</li> <li>Pi-Sulfur</li> <li>Pi-Pi Stacked</li> <li>Pi-Alkyl</li> </ul>                                       | No interactions found by the PoseView interaction model |
| <b>5b</b> | <p>Interactions</p> <ul style="list-style-type: none"> <li>van der Waals</li> <li>Conventional Hydrogen Bond</li> <li>Carbon Hydrogen Bond</li> <li>Unfavorable Acceptor-Acceptor</li> <li>Pi-Pi T-shaped</li> <li>Pi-Alkyl</li> </ul> |                                                         |

Table S2. Continued

| Compd | Discovery Studio                                                                                                                                                                                 | PoseView                                                |
|-------|--------------------------------------------------------------------------------------------------------------------------------------------------------------------------------------------------|---------------------------------------------------------|
| 5c    | <p>Interactions</p> <ul style="list-style-type: none"> <li>van der Waals</li> <li>Carbon Hydrogen Bond</li> <li>Pi-Cation</li> <li>Pi-Sulfur</li> <li>Pi-Pi Stacked</li> <li>Pi-Alkyl</li> </ul> |                                                         |
| 5d    | <p>Interactions</p> <ul style="list-style-type: none"> <li>van der Waals</li> <li>Pi-Cation</li> <li>Pi-Sulfur</li> <li>Pi-Pi Stacked</li> <li>Pi-Alkyl</li> </ul>                               | No interactions found by the PoseView interaction model |

**Table S3.** The 2D diagrams of interactions created by compounds **2l** and **5a-d** in the active site of caspase-9 (2ar9) generated by BIOVA Discovery Studio Visualizer and Pose View.

| Compd     | Discovery Studio                                                                                                                                                                                                                                      | PoseView |
|-----------|-------------------------------------------------------------------------------------------------------------------------------------------------------------------------------------------------------------------------------------------------------|----------|
| <b>2l</b> | <p>Interactions</p> <ul style="list-style-type: none"> <li>van der Waals</li> <li>Conventional Hydrogen Bond</li> <li><math>\pi</math>-<math>\pi</math> T-shaped</li> <li><math>\pi</math>-Alkyl</li> </ul>                                           |          |
| <b>5a</b> | <p>Interactions</p> <ul style="list-style-type: none"> <li>van der Waals</li> <li>Conventional Hydrogen Bond</li> <li>Carbon Hydrogen Bond</li> <li><math>\pi</math>-Arene</li> <li><math>\pi</math>-Sigma</li> <li><math>\pi</math>-Alkyl</li> </ul> |          |
| <b>5b</b> | <p>Interactions</p> <ul style="list-style-type: none"> <li>van der Waals</li> <li>Conventional Hydrogen Bond</li> <li><math>\pi</math>-Alkyl</li> </ul>                                                                                               |          |

Table S3. Continued

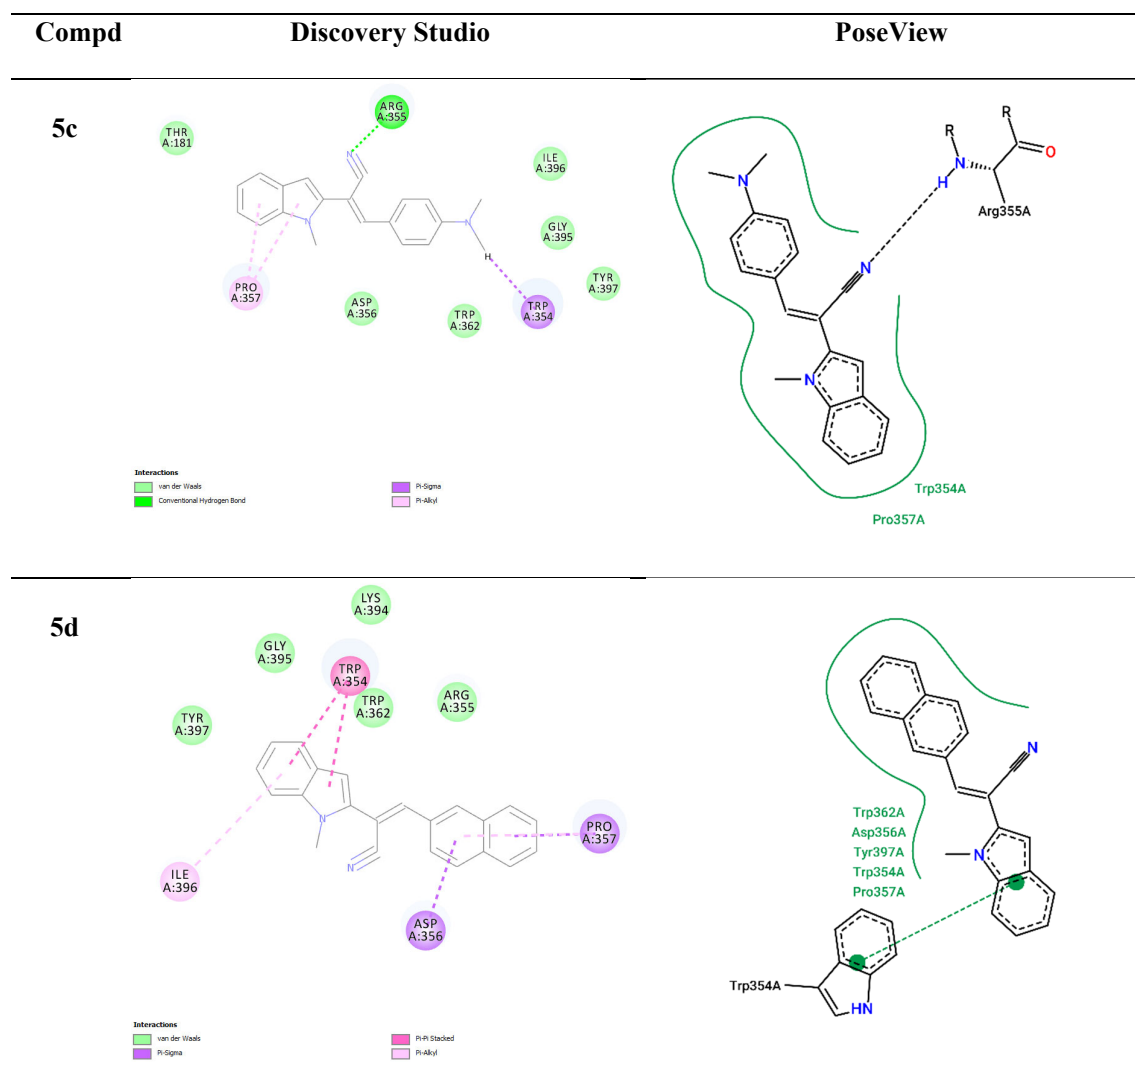

**Table S4.** The 2D diagrams of interactions created by compounds **2l** and **5a-d** in the active site of tubulin (5eyp) generated by BIOVA Discovery Studio Visualizer and Pose View.

| Compd | Discovery Studio                                                                                                                                                                                                                  | PoseView                                                |
|-------|-----------------------------------------------------------------------------------------------------------------------------------------------------------------------------------------------------------------------------------|---------------------------------------------------------|
| 2l    | <p>Interactions</p> <ul style="list-style-type: none"> <li>Carbon Hydrogen Bond</li> <li>Pi-Sulfur</li> <li>Alkyl</li> </ul>                                                                                                      | No interactions found by the PoseView interaction model |
| 5a    | <p>Interactions</p> <ul style="list-style-type: none"> <li>van der Waals</li> <li>Alkyl</li> <li>Alkyl</li> </ul>                                                                                                                 | No interactions found by the PoseView interaction model |
| 5b    | <p>Interactions</p> <ul style="list-style-type: none"> <li>van der Waals</li> <li>Conventional Hydrogen Bond</li> <li>Carbon Hydrogens Bond</li> <li>Pi-Sigma</li> <li>Pi-Sulfur</li> <li>Pi-Alkyl</li> <li>Pi-Halogen</li> </ul> | No interactions found by the PoseView interaction model |

Table S4. Continued

| Compd | Discovery Studio                                                                                                                                                                                                                   | PoseView                                                |
|-------|------------------------------------------------------------------------------------------------------------------------------------------------------------------------------------------------------------------------------------|---------------------------------------------------------|
| 5c    | 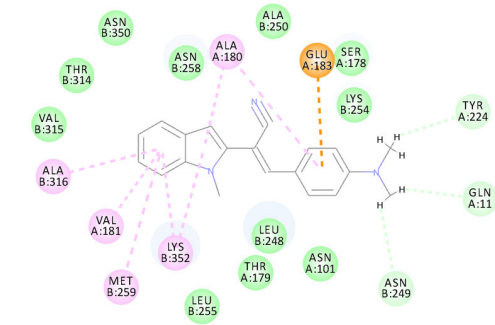 <p>Interactions</p> <ul style="list-style-type: none"><li>van der Waals</li><li>Carbon-Hydrogen Bond</li><li>Pi-Anion</li><li>Pi-Alkyl</li></ul> | No interactions found by the PoseView interaction model |
| 5d    |  <p>Interactions</p> <ul style="list-style-type: none"><li>van der Waals</li><li>Pi-Sigma</li><li>Pi-Sulfur</li><li>Pi-Alkyl</li></ul>           | No interactions found by the PoseView interaction model |



**Table S5.** The 2D diagrams of interactions created by compounds **2x** in the active site of penicillin-binding protein 4 (2ex8) generated by BIOVA Discovery Studio Visualizer and Pose View.

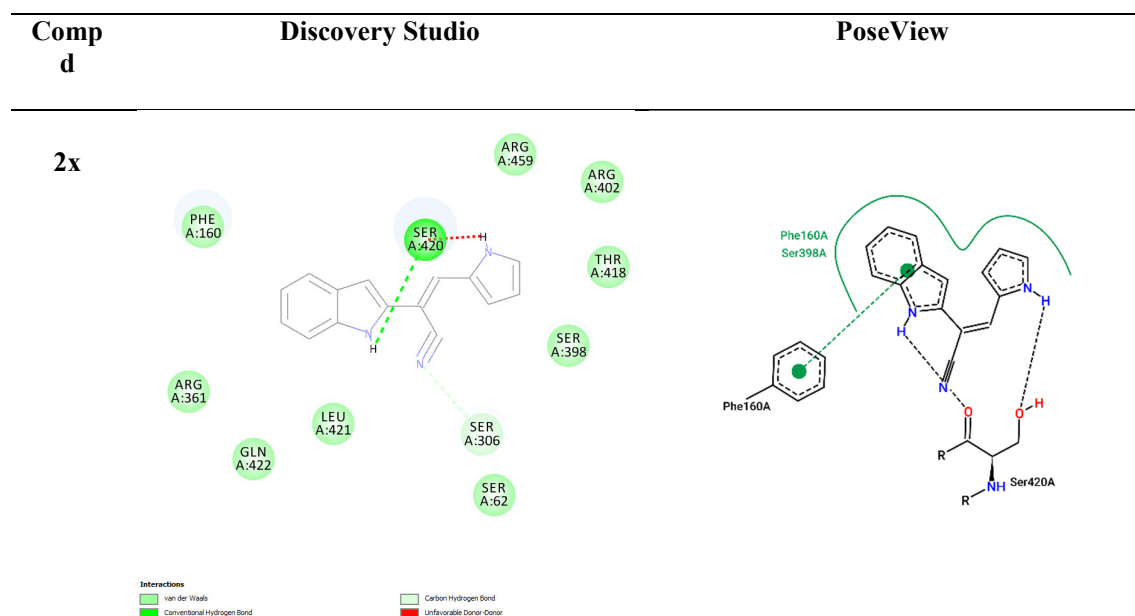

**Table S6.** The 2D diagrams of interactions created by compounds **2x** in the active site of  $\beta$ -lactamase (1fqg) generated by BIOVA Discovery Studio Visualizer and Pose View.

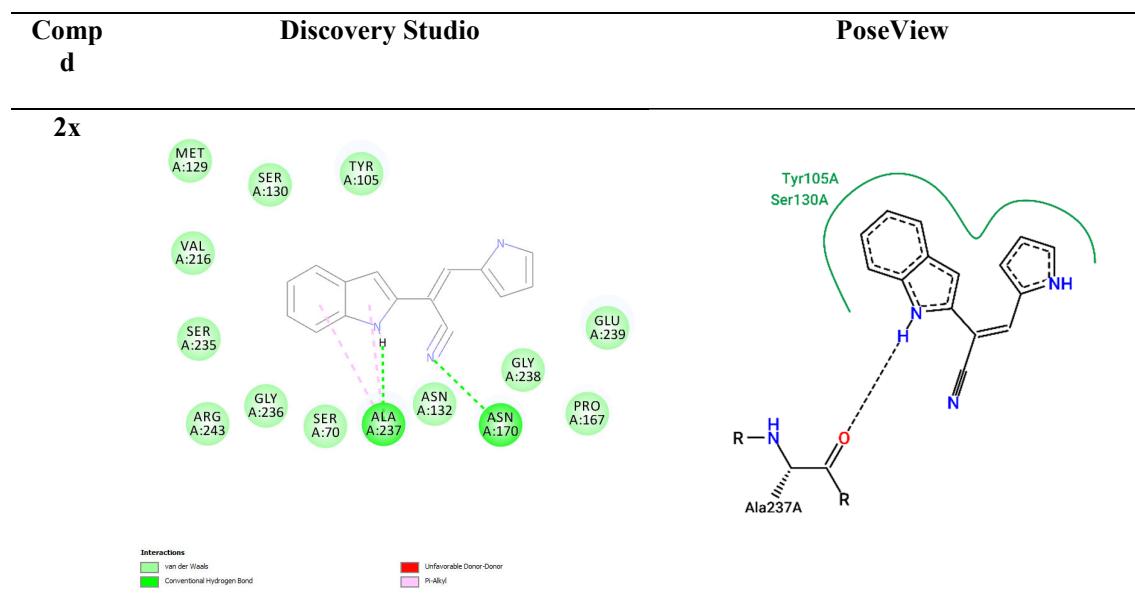

**Tables S7.** Predicted physicochemical, pharmacokinetic and drug-likeness properties of compounds **2l**, **2x**, **5a-d**.

|                                   | <b>Molecule</b>           | <b>2l</b>                                      | <b>2x</b>                                      | <b>5a</b>                                      | <b>5b</b>                                        | <b>5c</b>                                      | <b>5d</b>                                      |
|-----------------------------------|---------------------------|------------------------------------------------|------------------------------------------------|------------------------------------------------|--------------------------------------------------|------------------------------------------------|------------------------------------------------|
|                                   | Formula                   | C <sub>19</sub> H <sub>17</sub> N <sub>3</sub> | C <sub>15</sub> H <sub>11</sub> N <sub>3</sub> | C <sub>19</sub> H <sub>16</sub> N <sub>2</sub> | C <sub>19</sub> H <sub>16</sub> N <sub>2</sub> O | C <sub>20</sub> H <sub>19</sub> N <sub>3</sub> | C <sub>22</sub> H <sub>16</sub> N <sub>2</sub> |
| <b>Physicochemical Properties</b> | MW                        | 287.36                                         | 233.27                                         | 272.34                                         | 288.34                                           | 301.38                                         | 308.38                                         |
|                                   | Heavy atoms               | 22                                             | 18                                             | 21                                             | 22                                               | 23                                             | 24                                             |
|                                   | Aromatic heavy atoms      | 15                                             | 14                                             | 15                                             | 15                                               | 15                                             | 19                                             |
|                                   | Fraction Csp <sup>3</sup> | 0.11                                           | 0.00                                           | 0.11                                           | 0.11                                             | 0.15                                           | 0.05                                           |
|                                   | Rotatable bonds           | 3                                              | 2                                              | 2                                              | 3                                                | 3                                              | 2                                              |
|                                   | H-bond acceptors          | 1                                              | 1                                              | 1                                              | 2                                                | 1                                              | 1                                              |
|                                   | H-bond donors             | 1                                              | 2                                              | 0                                              | 0                                                | 0                                              | 0                                              |
|                                   | MR                        | 92.43                                          | 72.58                                          | 88.09                                          | 89.62                                            | 97.33                                          | 100.63                                         |
|                                   | TPSA                      | 42.82                                          | 55.37                                          | 28.72                                          | 37.95                                            | 31.96                                          | 28.72                                          |
|                                   | iLOGP                     | 2.71                                           | 1.67                                           | 3.11                                           | 3.14                                             | 3.15                                           | 3.16                                           |
| <b>Lipophilicity</b>              | XLOGP3                    | 3.99                                           | 2.69                                           | 4.18                                           | 3.79                                             | 3.94                                           | 5.07                                           |
|                                   | WLOGP                     | 4.19                                           | 3.45                                           | 4.44                                           | 4.14                                             | 4.20                                           | 5.29                                           |
|                                   | MLOGP                     | 2.59                                           | 1.39                                           | 3.20                                           | 2.59                                             | 2.82                                           | 3.69                                           |
|                                   | Silicos-IT Log P          | 3.99                                           | 3.86                                           | 4.31                                           | 3.84                                             | 3.47                                           | 4.86                                           |
|                                   | Consensus Log P           | 3.49                                           | 2.61                                           | 3.83                                           | 3.50                                             | 3.51                                           | 4.41                                           |
|                                   | ESOL Log S                | -4.44                                          | -3.42                                          | -4.56                                          | -4.32                                            | -4.48                                          | -5.40                                          |
| <b>Water Solubility</b>           | ESOL Solubility (mg/ml)   | 1.04e-02                                       | 8.78e-02                                       | 7.53e-03                                       | 1.37e-02                                         | 1.01e-02                                       | 1.23e-03                                       |
|                                   | ESOL Solubility (mol/l)   | 3.62e-05                                       | 3.76e-04                                       | 2.76e-05                                       | 4.76e-05                                         | 3.35e-05                                       | 3.98e-06                                       |
|                                   | ESOL Class                | Moderately soluble                             | Soluble                                        | Moderately soluble                             | Moderately soluble                               | Moderately soluble                             | Moderately soluble                             |
|                                   | Ali Log S                 | -4.59                                          | -3.51                                          | -4.49                                          | -4.28                                            | -4.31                                          | -5.42                                          |
|                                   | Ali Solubility (mg/ml)    | 7.37e-03                                       | 7.29e-02                                       | 8.77e-03                                       | 1.51e-02                                         | 1.47e-02                                       | 1.18e-03                                       |
|                                   | Ali Solubility (mol/l)    | 2.57e-05                                       | 3.12e-04                                       | 3.22e-05                                       | 5.24e-05                                         | 4.89e-05                                       | 3.84e-06                                       |
|                                   | Ali Class                 | Moderately soluble                             | Soluble                                        | Moderately soluble                             | Moderately soluble                               | Moderately soluble                             | Moderately soluble                             |
|                                   | Silicos-IT LogSw          | -6.08                                          | -5.19                                          | -5.92                                          | -5.66                                            | -5.64                                          | -7.20                                          |

|                            |                               |                |                    |                    |                    |                    |                |
|----------------------------|-------------------------------|----------------|--------------------|--------------------|--------------------|--------------------|----------------|
|                            | Silicos-IT Solubility (mg/ml) | 2.38e-04       | 1.49e-03           | 3.24e-04           | 6.31e-04           | 6.94e-04           | 1.95e-05       |
|                            | Silicos-IT Solubility (mol/l) | 8.28e-07       | 6.40e-06           | 1.19e-06           | 2.19e-06           | 2.30e-06           | 6.32e-08       |
|                            | Silicos-IT class              | Poorly soluble | Moderately soluble | Moderately soluble | Moderately soluble | Moderately soluble | Poorly soluble |
| <b>Pharmacokinetics</b>    | GI absorption                 | High           | High               | High               | High               | High               | High           |
|                            | BBB permeant                  | Yes            | Yes                | Yes                | Yes                | Yes                | Yes            |
|                            | Pgp substrate                 | No             | No                 | No                 | No                 | No                 | No             |
|                            | CYP1A2 inhibitor              | Yes            | Yes                | Yes                | Yes                | Yes                | Yes            |
|                            | CYP2C19 inhibitor             | Yes            | Yes                | Yes                | Yes                | Yes                | Yes            |
|                            | CYP2C9 inhibitor              | Yes            | Yes                | Yes                | Yes                | Yes                | Yes            |
|                            | CYP2D6 inhibitor              | Yes            | Yes                | No                 | No                 | Yes                | No             |
|                            | CYP3A4 inhibitor              | Yes            | Yes                | No                 | Yes                | Yes                | No             |
|                            | log Kp (cm/s)                 | -5.22          | -5.81              | -4.99              | -5.37              | -5.34              | -4.58          |
| <b>Drug-likeness</b>       | Lipinski violations           | 0              | 0                  | 0                  | 0                  | 0                  | 0              |
|                            | Ghose violations              | 0              | 0                  | 0                  | 0                  | 0                  | 0              |
|                            | Veber violations              | 0              | 0                  | 0                  | 0                  | 0                  | 0              |
|                            | Egan violations               | 0              | 0                  | 0                  | 0                  | 0                  | 0              |
|                            | Muegge violations             | 0              | 0                  | 0                  | 0                  | 0                  | 1              |
|                            | Bioavailability Score         | 0.55           | 0.55               | 0.55               | 0.55               | 0.55               | 0.55           |
| <b>Medicinal Chemistry</b> | PAINS alerts                  | 1              | 0                  | 0                  | 0                  | 1                  | 0              |
|                            | Brenk alerts                  | 1              | 1                  | 1                  | 1                  | 1                  | 1              |
|                            | Leadlikeness violations       | 1              | 1                  | 1                  | 1                  | 1                  | 1              |
|                            | Synthetic Accessibility       | 2.52           | 2.32               | 2.57               | 2.51               | 2.70               | 2.66           |

**Tables S8.** Predicted human intestinal absorption, Caco-2 cell and MDCK cell permeabilities for compounds **2l**, **2x**, **5a-d**.

| Compunds | Human intestinal absorption (%)                        | In vitro Caco-2 cell permeability (nm/s)  | In vitro MDCK cell permeability (nm/s)        |
|----------|--------------------------------------------------------|-------------------------------------------|-----------------------------------------------|
| Rule     | 0 - 20 (poor)<br>20 – 70 (moderate)<br>70 – 100 (well) | <4 (low)<br>4-70 (moderate)<br>>70 (high) | <25 (low)<br>25-500 (moderate)<br>>500 (high) |
| 2l       | 93.69                                                  | 57.59                                     | 0.09                                          |
| 2x       | 90.15                                                  | 12.20                                     | 48.88                                         |
| 5a       | 100.00                                                 | 55.86                                     | 46.73                                         |
| 5b       | 98.27                                                  | 55.43                                     | 14.80                                         |
| 5c       | 99.83                                                  | 57.65                                     | 0.16                                          |
| 5d       | 100.00                                                 | 55.74                                     | 54.34                                         |
